# Supplementary material for: Resistance training with different repetition duration to failure: effect on hypertrophy, strength and muscle activation
Source: PeerJ. 2021 Feb 25;9:e10909. doi: 10.7717/peerj.10909 (PMC7916538; doi:10.7717/peerj.10909)
Supplement: Supplemental Information 1 [file peerj-09-10909-s001.xlsx]

## Sheet: Data
																									Normalized EMG-angle relationship (RF) (%)															Normalized EMG-angle relationship (RF) (%)
																									2-s RD							6-s RD								2-s RD							6-s RD
	1-RM: Maximal dynamic strength test		Subjects	CSA VL (cm2)				CSA RF (cm2)				1-RM (kg)				MVIC 30o (N)				MVIC 90o (N)					6th experimental session							6th experimental session								39th experimental session							39th experimental session
	2-s RD: 2 seconds repetition duration			Pre		Post		Pre		Post		Pre		Post		Pre		Post		Pre		Post
	6-s RD: 6 seconds repetition duration			2-s RD	6-s RD	2-s RD	6-s RD	2-s RD	6-s RD	2-s RD	6-s RD	2-s RD	6-s RD	2-s RD	6-s RD	2-s RD	6-s RD	2-s RD	6-s RD	2-s RD	6-s RD	2-s RD	6-s RD		100-90o	90-80o	80-70o	70-60o	60-50o	50-40o	40-30o	100-90o	90-80o	80-70o	70-60o	60-50o	50-40o	40-30o		100-90o	90-80o	80-70o	70-60o	60-50o	50-40o	40-30o	100-90o	90-80o	80-70o
	cm2: square centimeters		1	48.87	65.61	60.90	70.78	17.85	16.96	20.22	19.37	34.72	33.26	39.60	42.20	431.25	492.82	460.67	528.46	570.97	469.96	595.82	601.57		93.41	93.77	108.15	107.46	113.74	119.38	113.06	55.00	60.51	64.10	69.13	80.96	97.46	126.43		89.90	108.15	100.69	100.00	93.21	105.50	69.54	38.78	48.74	49.95
	CSA: Muscle cross-sectional area		2	73.83	62.63	87.30	74.47	14.80	14.78	20.86	17.42	32.76	32.58	35.38	33.18	385.87	426.75	434.09	498.70	613.66	571.15	755.18	685.98		58.57	72.88	78.59	76.79	69.60	59.05	31.60	34.90	38.54	44.61	46.38	51.19	58.29	68.09		60.67	80.80	80.82	80.36	72.94	61.79	33.50	22.27	30.26	36.35
	kg: kilogram		3	75.96	80.72	97.39	95.25	14.23	14.13	18.90	20.38	46.38	43.28	52.72	48.98	606.14	643.31	602.51	629.30	760.31	765.08	878.11	771.41		61.53	59.71	56.95	53.56	48.53	45.85	34.56	29.83	33.12	34.11	37.17	45.34	48.33	55.05		65.33	74.23	75.56	69.10	73.03	73.28	46.22	86.54	88.31	88.26
	MVIC 30o: Maximal voluntary isometric contraction test at 30o		4	71.56	67.87	76.13	81.77	20.08	21.25	24.25	25.38	35.50	31.78	35.50	31.78	578.94	521.32	594.37	558.65	648.99	636.01	724.05	630.35		80.95	87.77	94.51	92.21	99.01	110.7	89.12	54.18	68.76	76.28	75.11	80.54	93.22	108.35		61.08	70.18	78.80	78.46	78.10	77.33	55.03	30.90	41.44	47.82
	MVIC 90o: Maximal voluntary isometric contraction test at 90o		5	59.21	65.28	60.28	65.34	14.52	15.06	15.52	15.83	24.30	23.30	27.50	27.36	395.87	425.35	411.05	494.83	443.32	447.51	452.04	487.37		76.92	93.89	106.56	113.71	117.50	129.24	92.49	45.23	62.27	74.6	84.28	94.53	117.22	123.79		85.18	101.44	103.62	103.00	102.78	103.44	85.08	48.81	50.65	55.60
	N: Newton		6	45.73	41.41	55.05	50.00	10.14	10.02	14.32	13.30	17.14	16.14	20.16	18.16	292.77	298.05	286.88	321.84	391.77	346.80	460.58	425.17		75.33	86.13	92.84	111.81	110.63	87.02	61.33	42.96	45.89	50.44	56.94	61.32	70.81	79.08		65.67	83.69	87.00	89.43	95.70	89.14	65.92	52.44	63.20	68.64
	post: post-test values		7	46.59	47.47	62.10	61.59	16.58	14.24	22.29	19.62	20.14	20.14	22.94	22.94	416.46	362.35	423.42	442.60	335.97	327.43	413.76	444.48		71.43	67.56	67.18	75.53	77.28	78.09	57.28	35.75	40.97	46.68	49.61	55.48	59.37	65.73		57.47	73.78	72.91	72.01	67.87	64.28	37.94	26.17	35.16	40.09
	pre: pre-test values		8	74.79	64.54	90.36	82.83	20.54	18.80	24.75	23.52	27.88	28.42	28.62	29.64	471.71	480.92	438.30	494.99	627.24	580.80	700.95	614.12		68.39	68.62	68.10	64.09	59.27	54.25	42.08	29.41	40.15	42.16	46.89	48.43	55.20	63.03		84.10	85.69	80.88	87.58	79.60	77.40	34.08	63.21	54.48	56.35
	RF: Rectus femoris muscle		9	55.45	70.39	70.16	77.62	16.56	15.21	19.32	17.34	29.60	29.60	34.30	33.30	380.18	340.10	372.40	347.12	391.73	398.85	462.40	446.37		105.99	94.87	96.11	103.8	109.08	110.73	70.56	52.58	63.52	68.4	70.60	83.42	89.15	90.96		63.64	71.29	71.25	72.11	65.86	56.82	39.57	27.88	35.23	40.84
	VL: Vastus lateralis muscle		10	81.34	77.24	93.09	88.07	23.90	33.33	29.90	34.20	30.68	28.68	38.52	37.50	433.67	454.91	457.82	455.89	558.93	458.32	629.68	645.56		48.01	57.11	60.54	60.9	65.32	74.24	64.56	29.29	35.75	41.58	46.38	50.06	57.07	59.29		62.18	69.79	83.19	89.67	97.35	94.09	62.97	31.39	30.35	32.56
[truncated: 60 more columns]
